# Supplementary material
Source: PubMed Central journal article supplement (PMC1803715)
Supplement: plntphys_pp.106.089615_4.pdf [file plntphys_pp.106.089615_4.pdf]

**Supplemental Table I.** Characteristics of PCR markers and respective primersPolymorphic PCR markers in parental genotypes *S. arcanum* accessions LA2157 and LA392.

| Marker name  | Marker type | Primer name        | Primer sequence                                                  | T <sub>m</sub> (°C) <sup>a</sup> | PCR product size (bp)                                | Restriction enzyme |
|--------------|-------------|--------------------|------------------------------------------------------------------|----------------------------------|------------------------------------------------------|--------------------|
| CT119        | Codominant  | CT119-F<br>CT119-R | 5'- TCAGGTATCGAACCAAAACC -3'<br>5'- TAAAAGGTTTCATCCTAATAC-3'     | 55                               | 450 <sup>b</sup>                                     | <i>MseI</i>        |
| <i>Cf-2</i>  | Codominant  | CF2-F<br>CF2-R     | 5'- CTAGGCAGCGATTTCCATTT -3'<br>5'- CGGAATAGGTAATGGCCTTC -3'     | 62                               | 530 <sup>b</sup>                                     | <i>TaqI</i>        |
| Rex-1        | Codominant  | REX-F<br>REX-R     | 5'- TCGGAGCCTTGGTCTGAATT -3'<br>5'- GCCAGAGATGATTCGTGAGA -3'     | 58                               | 750 <sup>b</sup>                                     | <i>TaqI</i>        |
| C8B          | Dominant    | C8B-F<br>C8B-R     | 5'- TACCCACGCCCCATCAATG -3'<br>5'- TGCAAGAGGGTGAATATTGAGTGC -3'  | 58                               | 360 <sup>c</sup><br>360, 400                         | SCAR               |
| <i>Aps-1</i> | Codominant  | APS-F1<br>APS-R1   | 5'- GGATTTTCGTGTTCTTGGTG -3'<br>5'- GCCCAGTCAGCAAGAAAAC -3'      | 58                               | 1600 <sup>b</sup>                                    | <i>TaqI</i>        |
| Mint-1       | Codominant  | Mint-do<br>Mint-up | 5'- TTCTCTAGCTAAACTTCAGCC -3'<br>5'- TTTTCGTTTTTCCATGATTCTAC -3' | 57                               | 1,235, 713, 556 <sup>c</sup><br>1,372, 844, 786, 752 | SCAR               |

<sup>a</sup>PCR annealing temperature. <sup>b</sup>A single fragment of the same size was amplified from both accessions prior to restriction. <sup>c</sup>Product(s) on the top lane is from LA392 and on the bottom lane is from LA2157.

---

**Supplemental Table II.** Genetic analysis of F<sub>3</sub> progeny

Segregation of F<sub>3</sub> progenies of *S. arcanum* LA2157 x LA392 for root-knot nematode heat-stable resistance at 32°C. Class designation is from Table I.

---

| F <sub>2</sub> family | Number of plants |   | Chi Square <sup>a</sup> | P <sup>a</sup> |
|-----------------------|------------------|---|-------------------------|----------------|
|                       | R                | S |                         |                |
| Class 4               |                  |   |                         |                |
| E43                   | 9                | 4 | 0.230                   | 0.63           |
| M15                   | 14               | 4 | 0.074                   | 0.78           |
| G7                    | 10               | 4 | 0.095                   | 0.75           |
| P36                   | 11               | 3 | 0.095                   | 0.75           |
| R36                   | 9                | 3 | 0                       | 1              |
| G58                   | 11               | 3 | 0.095                   | 0.75           |
| Class 5               |                  |   |                         |                |
| I13                   | 13               | 4 | 0.019                   | 0.88           |
| B26                   | 15               | 4 | 0.158                   | 0.69           |
| G26                   | 13               | 4 | 0.019                   | 0.88           |
| E40                   | 12               | 4 | 0                       | 1              |
| I62                   | 16               | 5 | 0.016                   | 0.90           |
| B14                   | 12               | 4 | 0                       | 1              |
| E2                    | 11               | 3 | 0.095                   | 0.76           |
| A6                    | 11               | 3 | 0.095                   | 0.76           |
| Class 8               |                  |   |                         |                |
| R35                   | 10               | 3 | 0.025                   | 0.87           |
| R26                   | 18               | 5 | 0.130                   | 0.72           |
| E42                   | 16               | 6 | 0.06                    | 0.80           |
| D52                   | 16               | 4 | 0.267                   | 0.60           |
| A56                   | 9                | 3 | 0                       | 1              |
| Class 10              |                  |   |                         |                |
| E27                   | 11               | 4 | 0.022                   | 0.88           |

---

<sup>a</sup>Based on 3R:1S expected ratio. <sup>b</sup>Based on df=1.

---

**Supplemental Table III.** Segregation of *Mi-9* phenotype, *Mi-1* homologues, and linked markers in parents and key recombinants

Parental, F<sub>2</sub> and F<sub>3</sub> plants were genotyped using PCR and AFLP markers. Class designation is from Table II. Genotype designation (1) homozygous resistant locus, (2) homozygous susceptible, (3) heterozygous, (1/3) resistant allele is dominant, and (2/3) susceptible allele is dominant. *Mi-1* homologues were amplified using *Mi-1* intron 1 (Mint) flanking primers. Plants were also evaluated for nematode resistance (R) or susceptibility (S) to root knot nematodes strain VW4 at 32°C.

| Plant  | Generation             | Phenotype | Mint                                 | Markers |             |       |        |       |                |              |
|--------|------------------------|-----------|--------------------------------------|---------|-------------|-------|--------|-------|----------------|--------------|
|        |                        |           |                                      | CT119   | <i>Cf-2</i> | Rex-1 | C264.1 | C32.1 | C8B            | <i>Aps-1</i> |
| LA2157 | Parent                 | R         | RH1, RH2, RH3, RH4,                  | 1       | 1           | 1     | 1/3    | 1     | 1/3            | 1            |
| LA392  | Parent                 | S         | SH1, SH2, SH3                        | 2       | 2           | 2     | 2      | 2/3   | 2              | 2            |
| E42    | F <sub>2</sub> class 8 | R         | RH1, RH2, RH3, RH4,<br>SH1, SH2, SH3 | 3       | 3           | 3     | 1/3    | 2/3   | 1 <sup>a</sup> | 1            |
| E42-A4 | F <sub>3</sub>         | S         | SH1, SH2, SH3                        | 2       | 2           | 2     | 2      | 2/3   | 1/3            | 1            |
| R26    | F <sub>2</sub> class 8 | R         | RH1, RH2, RH3, RH4,<br>SH1, SH2, SH3 | 3       | 3           | 3     | 1/3    | 2/3   | 1/3            | 1            |
| R26-D6 | F <sub>3</sub>         | S         | SH1, SH2, SH3                        | 2       | 2           | 2     | 2      | 2/3   | 1 <sup>a</sup> | 1            |
| D52    | F <sub>2</sub> class 8 | R         | RH1, RH2, RH3, RH4,<br>SH1, SH2, SH3 | 3       | 3           | 3     | 1/3    | 2/3   | 1/3            | 1            |
| D52-B5 | F <sub>3</sub>         | S         | SH1, SH2, SH3                        | 2       | 2           | 2     | 2      | 2/3   | 1 <sup>a</sup> | 1            |
| R35    | F <sub>2</sub> class 8 | R         | RH1, RH2, RH3, RH4,<br>SH1, SH2, SH3 | 3       | 3           | 3     | 1/3    | 2/3   | 1/3            | 1            |
| R35-B1 | F <sub>3</sub>         | S         | SH1, SH2, SH3                        | 2       | 2           | 2     | 2      | 2/3   | 1 <sup>a</sup> | 1            |
| A56    | F <sub>2</sub> class 8 | R         | RH1, RH2, RH3, RH4,<br>SH1, SH2      | 3       | 3           | 3     | 1/3    | 2/3   | 1 <sup>a</sup> | 1            |

|        |                         |   |                                      |   |   |   |     |     |                |   |
|--------|-------------------------|---|--------------------------------------|---|---|---|-----|-----|----------------|---|
| A56-E3 | F <sub>3</sub>          | R | RH1, RH2, RH3, SH1, SH2              | 2 | 2 | 2 | 2   | 2/3 | 1/3            | 1 |
| A42    | F <sub>2</sub> class 9  | R | RH1, RH2, RH3, SH1, SH2,<br>SH3      | 2 | 2 | 2 | 2   | 2/3 | 3 <sup>a</sup> | 3 |
| A42-D2 | F <sub>3</sub>          | R | RH1, RH2, RH3, SH1, SH2              | 2 | 2 | 2 | 2   | 1   | 1/3            | 1 |
| E27    | F <sub>2</sub> class 10 | R | RH1, RH2, RH3, RH4, SH3              | 1 | 1 | 1 | 1/3 | 2/3 | 3 <sup>a</sup> | 3 |
| E27-H3 | F <sub>3</sub>          | S | RH4, SH3                             | 1 | 1 | 1 | 2   | 2/3 | 2              | 2 |
| I47    | F <sub>2</sub> class 11 | R | RH1, RH2, RH3, RH4,<br>SH1, SH2, SH3 | 2 | 2 | 3 | 1/3 | 2/3 | 1/3            | 3 |
| M59    | F <sub>2</sub> class 12 | S | RH4, SH1, SH2, SH3                   | 3 | 3 | 2 | 2   | 2/3 | 2              | 2 |
| M59-F4 | F <sub>3</sub>          | S | RH4, SH3                             | 1 | 1 | 2 | 2   | 2/3 | 2              | 2 |
| U4     | F <sub>2</sub> class 12 | S | SH1, SH2, SH3                        | 3 | 3 | 2 | 2   | 2/3 | 2              | 2 |
| 188    | F <sub>2</sub> class 14 | R | RH1, RH2, RH3, RH4,<br>SH1, SH2, SH3 | 2 | 3 | 3 | 1/3 | 2/3 | 3 <sup>a</sup> | 3 |
| 188-D2 | F <sub>3</sub>          | R | RH1, RH2, RH3, RH4,<br>SH1, SH2      | 2 | 1 | 1 | 1/3 | 1   | 1/3            | 1 |

---

<sup>a</sup>Allele designation is based on F<sub>3</sub> progeny genotyping.

---
