# Supplementary material
Source: PubMed Central journal article supplement (PMC1803715)

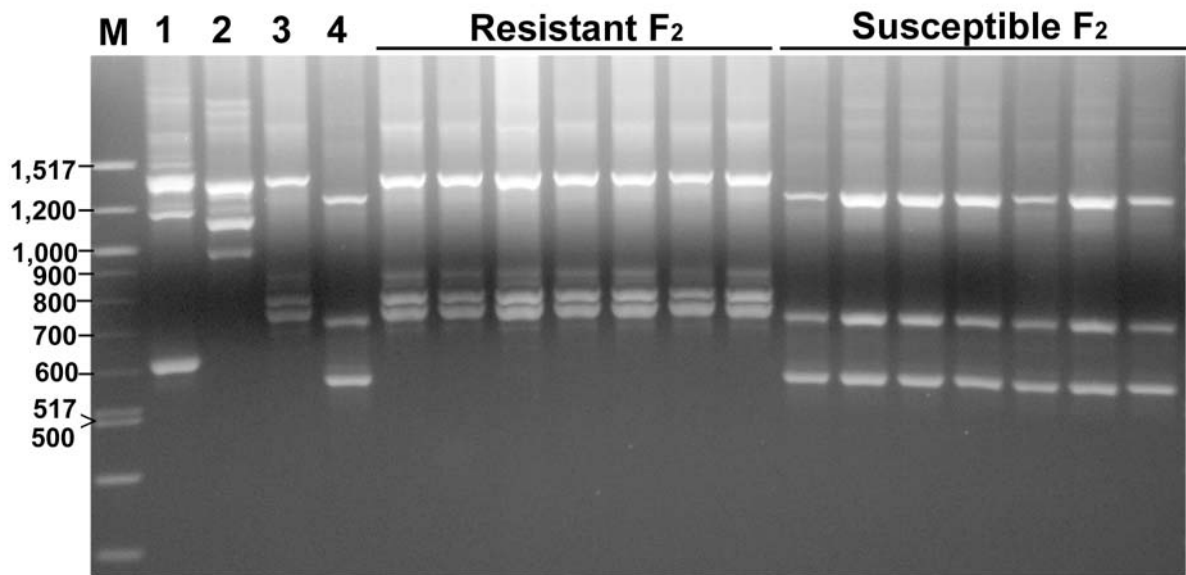

**Fig. S1**

Supplement: plntphys_pp.106.089615_1.pdf [file plntphys_pp.106.089615_1.pdf]

**A**

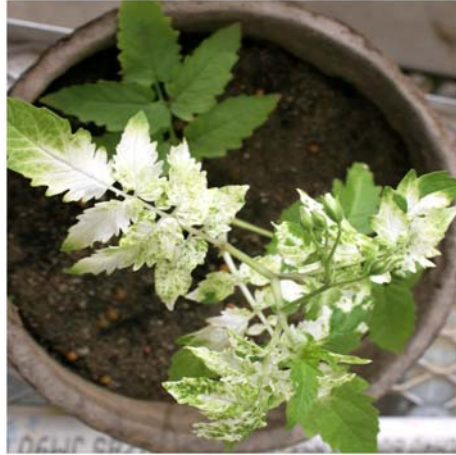

**B**

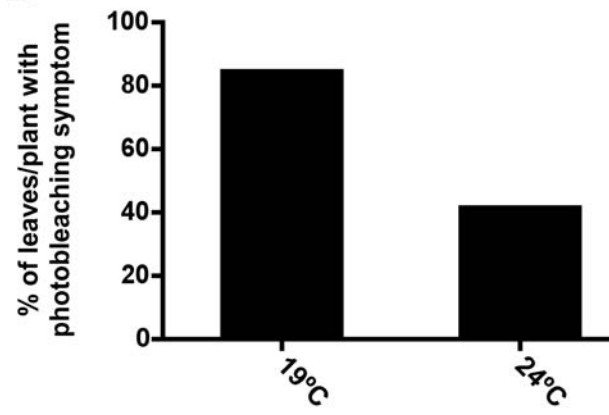

**Fig. S3**

Supplement: plntphys_pp.106.089615_2.pdf [file plntphys_pp.106.089615_2.pdf]
